# Supplementary material
Source: publisher figshare collection journal article supplement (https://gsajournals.figshare.com/ndownloader/files/18045089)
Supplement: Supplementary file 1 [file 18045089]

## Sheet: Table S8
Table S8: Details of de novo transposable element insertion events.
Genotype	Chr	Start	End	Stock	Dad Genotype	Total Siblings	Approx Position	Family	Reads	Class	Notes
Canton-S/w1118	chr2L	4057074	4057701	w13.5	w	12	4057531	DM_ROO	24	Retro
Canton-S/w1118	chr2L	4103472	4104211	cs6.8	cs	8	4103791	DMTNFB	19	unclear
Canton-S/w1118	chr2L	4838313	4838835	w15.8	w	13	4838657	DM33463	15	DNA
Canton-S/w1118	chr2L	6409578	6410149	cs6.8	cs	8	6409931	DMTNFB	25	unclear
Canton-S/w1118	chr2L	6805801	6805916	cs2.4	cs	8	6805764	DMHFL1	27	DNA
Canton-S/w1118	chr2L	13641301	13641514	cs7.3	cs	8	13641727	DMHFL1	23	DNA
Canton-S/w1118	chr2L	16975494	16976112	cs12.3	cs	18	16975965	DMHFL1	17	DNA
Canton-S/w1118	chr2L	17381704	17382214	cs6.5	cs	8	17381999	DMTNFB	31	unclear
Canton-S/w1118	chr2L	19624259	19624309	cs2.7	cs	8	19624522	DMLINEJA	20	Retro
Canton-S/w1118	chr2R	5091799	5092119	cs1.4	cs	8	5092017	DMHFL1	22	DNA
Canton-S/w1118	chr2R	13118781	13119393	cs12.16	cs	18	13119198	DMHFL1	16	DNA
Canton-S/w1118	chr2R	14997457	14997480	w4.4	w	15	14997893	DMBLPP	14	Retro
Canton-S/w1118	chr2R	17350652	17351005	cs5.8	cs	8	17351030	DMHFL1	29	DNA
Canton-S/w1118	chr2R	17359721	17360082	cs12.2	cs	18	17359752	DMHFL1	13	DNA
Canton-S/w1118	chr2R	20960108	20960656	w15.4	w	13	20960400	DM_ROO	14	Retro
Canton-S/w1118	chr2R	21078227	21078839	cs7.8	cs	8	21078561	DMHFL1	45	DNA
Canton-S/w1118	chr3L	4373658	4374253	w3.9	w	18	4373954	JUAN	20	Retro
Canton-S/w1118	chr3L	6556457	6556525	w5.1	w	16	6556153	DMHFL1	34	DNA
Canton-S/w1118	chr3L	11326239	11326581	w3.8	w	18	11326433	DMBLPP	8	Retro
Canton-S/w1118	chr3L	18449374	18449921	cs14.12	cs	13	18449670	DMHFL1	15	DNA
Canton-S/w1118	chr3L	19411708	19412092	cs1.7	cs	8	19411917	DMHFL1	20	DNA
Canton-S/w1118	chr3L	20522581	20522742	w3.6	w	18	20522458	DMBLPP	14	Retro
Canton-S/w1118	chr3L	20819260	20819436	cs14.4	cs	13	20819283	DMTNFB	7	unclear
Canton-S/w1118	chr3L	22389131	22389329	cs14.10	cs	13	22389425	DMTNFB	10	unclear
Canton-S/w1118	chr3R	6061316	6061744	w3.8	w	18	6061591	DMHFL1	18	DNA
Canton-S/w1118	chr3R	8576452	8577198	cs7.4	cs	8	8576876	DMLINEJA	21	Retro
Canton-S/w1118	chr3R	8578485	8579253	w3.16	w	18	8578826	DMBARI1	30	DNA
Canton-S/w1118	chr3R	10445775	10446441	cs7.5	cs	8	10446151	DMHFL1	28	DNA
Canton-S/w1118	chr3R	11540909	11541280	cs12.3	cs	18	11541092	DMHFL1	15	DNA
Canton-S/w1118	chr3R	11542373	11542937	cs1.7	cs	8	11542733	DMHFL1	23	DNA
Canton-S/w1118	chr3R	11552859	11553291	w3.24	w	18	11553052	DMHFL1	17	DNA
Canton-S/w1118	chr3R	13117767	13118200	w13.9	w	12	13117981	DM_ROO	7	Retro
Canton-S/w1118	chr3R	18630882	18631415	cs12.1	cs	18	18631196	DM_ROO	18	Retro
Canton-S/w1118	chr3R	19107173	19107705	cs1.1	cs	8	19107556	DMBLPP	22	Retro
Canton-S/w1118	chr3R	21904771	21905251	cs9.1	cs	1	21904988	DM_ROO	22	Retro
Canton-S/w1118	chr3R	22954276	22954818	cs6.4	cs	8	22954496	DMHFL1	15	DNA
Canton-S/w1118	chr3R	23961327	23962066	cs2.4	cs	8	23961673	DMLINEJA	24	Retro
Canton-S/w1118	chr3R	25799926	25800284	cs14.13	cs	13	25800110	DM_ROO	12	Retro
Canton-S/w1118	chr3R	30089624	30090327	cs8.6	cs	8	30090005	DMLINEJA	32	Retro
Canton-S/w1118	chr3R	31407476	31407855	cs9.1	cs	1	31407708	DMTNFB	16	unclear
Canton-S/w1118	chr4	984337	984638	cs8.6	cs	8	984490	DMBLPP	9	Retro
Canton-S/w1118	chrX	5260007	5260380	cs13.13	cs	18	5260229	DM_ROO	18	Retro
Canton-S/w1118	chrX	12050675	12051265	cs14.5	cs	13	12050975	DMTNFB	16	unclear
Canton-S/w1118	chrX	17651504	17652292	w4.12	w	15	17651944	ROXELEMENT	27	Retro
c(3)G68/c(3)G68	chr2L	14980599	14981210	c3g1.1	w1118	2	14980819	DM_ROO	19	Retro
c(3)G68/c(3)G68	chr3R	13612604	13612942	c3g1.2	w1118	2	13612819	DMHFL1	14	DNA
c(3)G68/c(3)G68	chr2R	14492954	14493395	c3g10.10	w1118	21	14493134	DMW1DOC	6	Retro
c(3)G68/c(3)G68	chr3R	4611930	4612409	c3g10.10	w1118	21	4612081	DMW1DOC	18	Retro
c(3)G68/c(3)G68	chr3R	10724880	10725182	c3g10.11	w1118	21	10725034	DMW1DOC	10	Retro
c(3)G68/c(3)G68	chr3R	23719797	23719938	c3g10.11	w1118	21	23719873	DM_ROO	18	Retro
c(3)G68/c(3)G68	chr2R	5243569	5243606	c3g10.18	w1118	21	5243800	GTWIN	14	Retro	X0 male
c(3)G68/c(3)G68	chr3R	30944702	30945003	c3g10.18	w1118	21	30944854	DMW1DOC	13	Retro
c(3)G68/c(3)G68	chr2R	24912148	24912616	c3g10.19	w1118	21	24913455	DMMDG3	13	Retro
c(3)G68/c(3)G68	chrX	6891724	6892124	c3g10.19	w1118	21	6891963	DMBLPP	8	Retro
c(3)G68/c(3)G68	chrX	12212430	12212914	c3g10.2	w1118	21	12212765	DMMDG3	8	Retro
c(3)G68/c(3)G68	chr3L	2974573	2974722	c3g10.2	w1118	21	2974647	DMRTMGD1	27	Retro
c(3)G68/c(3)G68	chr3L	14658074	14658095	c3g10.21	w1118	21	14658085	DMW1DOC	11	Retro
c(3)G68/c(3)G68	chr3L	25479062	25479192	c3g10.21	w1118	21	25479129	DMCR1A	12	Retro
c(3)G68/c(3)G68	chr3L	21331876	21332524	c3g10.3	w1118	21	21332210	DMW1DOC	11	Retro
c(3)G68/c(3)G68	chrX	1158327	1158817	c3g10.5	w1118	21	1158596	DM_ROO	17	Retro
c(3)G68/c(3)G68	chr3R	30171261	30171753	c3g10.8	w1118	21	30171527	JUAN	16	Retro
c(3)G68/c(3)G68	chr2L	9454360	9454688	c3g2.11	w1118	7	9454541	DMTNFB	8	unclear
c(3)G68/c(3)G68	chr3R	29072582	29073200	c3g2.11	w1118	7	29072905	DMTNFB	13	unclear
c(3)G68/c(3)G68	chr3L	6812991	6813393	c3g2.3	w1118	7	6813244	GTWIN	13	Retro
c(3)G68/c(3)G68	chr2L	14200875	14201231	c3g2.9	w1118	7	14201088	DMW1DOC	7	Retro
c(3)G68/c(3)G68	chr3L	4798204	4798629	c3g2.9	w1118	7	4798480	DM_ROO	24	Retro
c(3)G68/c(3)G68	chr3R	26254932	26255310	c3g3.1	w1118	5	26255161	GTWIN	11	Retro
c(3)G68/c(3)G68	chr3L	10495964	10496381	c3g3.2	w1118	5	10496179	DMTNFB	23	unclear
c(3)G68/c(3)G68	chrX	5267430	5268017	c3g3.3	w1118	5	5267693	DM_ROO	15	Retro
c(3)G68/c(3)G68	chr3R	9826148	9826882	c3g3.5	w1118	5	9826413	Tinker	13	Retro
c(3)G68/c(3)G68	chrX	3244928	3245170	c3g4.1	w1118	3	3244945	DM_ROO	16	Retro	X0 male
c(3)G68/c(3)G68	chrX	17992052	17992584	c3g4.1	w1118	3	17992321	Tinker	21	Retro	X0 male
c(3)G68/c(3)G68	chr2R	14352834	14353504	c3g5.1	w1118	10	14353099	DMTNFB	16	unclear	X0 male
c(3)G68/c(3)G68	chrX	10634809	10635337	c3g5.2	w1118	10	10635033	DMTNFB	10	unclear
c(3)G68/c(3)G68	chrX	17145925	17146337	c3g5.2	w1118	10	17146153	DMTNFB	18	unclear
c(3)G68/c(3)G68	chrX	2756957	2757456	c3g5.3	w1118	10	2757112	DMTNFB	15	unclear
c(3)G68/c(3)G68	chrX	10411234	10411602	c3g5.4	w1118	10	10411447	DMMDG3	12	Retro
c(3)G68/c(3)G68	chr3L	14133652	14134162	c3g5.5	w1118	10	14133953	JUAN	17	Retro
c(3)G68/c(3)G68	chr3R	18864431	18864786	c3g5.5	w1118	10	18864638	DM_ROO	14	Retro
c(3)G68/c(3)G68	chrX	3065889	3066555	c3g5.6	w1118	10	3066385	DMTNFB	16	unclear
c(3)G68/c(3)G68	chrX	10114838	10115266	c3g5.8	w1118	10	10115119	DMTNFB	13	unclear	X0 male
c(3)G68/c(3)G68	chr3L	519661	520032	c3g6.2	w1118	17	519856	DMTNFB	10	unclear
c(3)G68/c(3)G68	chr2R	12540459	12540837	c3g6.6	w1118	17	12540688	GTWIN	6	Retro
c(3)G68/c(3)G68	chr3L	11218425	11218777	c3g6.8	w1118	17	11218629	DMTNFB	21	unclear
c(3)G68/c(3)G68	chr2R	8020051	8020414	c3g6.9	w1118	17	8020277	DMW1DOC	10	Retro	X0 male
c(3)G68/c(3)G68	chr2R	24655708	24656069	c3g7.11	w1118	17	24655919	DMW1DOC	6	Retro
c(3)G68/c(3)G68	chr2R	22813605	22813994	c3g7.12	w1118	17	22813759	DMW1DOC	6	Retro
c(3)G68/c(3)G68	chr3L	5863830	5864295	c3g7.12	w1118	17	5864092	DMW1DOC	11	Retro
c(3)G68/c(3)G68	chr2L	9390153	9390479	c3g7.13	w1118	17	9390334	DMW1DOC	6	Retro
c(3)G68/c(3)G68	chrX	13452917	13453237	c3g7.14	w1118	17	13453114	DMW1DOC	6	Retro
c(3)G68/c(3)G68	chr2L	9338833	9339178	c3g7.15	w1118	17	9339037	DMW1DOC	8	Retro
c(3)G68/c(3)G68	chr3R	22889823	22890166	c3g7.15	w1118	17	22890020	DMIFACA	10	Retro
c(3)G68/c(3)G68	chrX	3005477	3005624	c3g7.16	w1118	17	3005476	DMMDG3	16	Retro
c(3)G68/c(3)G68	chr2R	18526562	18527122	c3g7.3	w1118	17	18526979	DMW1DOC	18	Retro
c(3)G68/c(3)G68	chrX	7535051	7535495	c3g7.3	w1118	17	7535248	DMIFACA	11	Retro
c(3)G68/c(3)G68	chr2L	5634857	5635322	c3g7.5	w1118	17	5635038	DMW1DOC	9	Retro	X0 male
c(3)G68/c(3)G68	chr2L	22754287	22754588	c3g7.5	w1118	17	22754438	DMW1DOC	7	Retro	X0 male
c(3)G68/c(3)G68	chr2R	10080479	10080913	c3g7.5	w1118	17	10080698	DMW1DOC	9	Retro	X0 male
c(3)G68/c(3)G68	chr2L	15912675	15913059	c3g7.6	w1118	17	15912883	DMW1DOC	7	Retro	X0 male
c(3)G68/c(3)G68	chr2R	6669295	6669596	c3g7.6	w1118	17	6669451	DMW1DOC	6	Retro	X0 male
c(3)G68/c(3)G68	chr2L	2799019	2799603	c3g7.8	w1118	17	2799214	DMW1DOC	6	Retro
c(3)G68/c(3)G68	chr3L	16636205	16636619	c3g7.8	w1118	17	16636474	DMIFACA	10	Retro
c(3)G68/c(3)G68	chr3R	20938504	20938937	c3g8.10	w1118	5	20938708	DMMDG3	13	Retro
c(3)G68/c(3)G68	chr2R	7389506	7390021	c3g8.2	w1118	5	7389739	DMW1DOC	7	Retro
c(3)G68/c(3)G68	chr3L	17923095	17923736	c3g8.2	w1118	5	17923294	DM_ROO	13	Retro
c(3)G68/c(3)G68	chr3R	23329586	23329988	c3g8.2	w1118	5	23329744	DMW1DOC	10	Retro
c(3)G68/c(3)G68	chr2L	7499226	7499764	c3g8.4	w1118	5	7499456	DMW1DOC	6	Retro
c(3)G68/c(3)G68	chr2R	22863937	22864238	c3g8.4	w1118	5	22864093	DMW1DOC	8	Retro
c(3)G68/c(3)G68	chr2R	15498030	15498654	c3g9.2	w1118	8	15498238	DMIFACA	8	Retro
c(3)G68/c(3)G68	chr2R	23131698	23131999	c3g9.3	w1118	8	23131855	DMW1DOC	9	Retro
c(3)G68/c(3)G68	chrX	10328901	10329228	c3g9.7	w1118	8	10329105	DMW1DOC	6	Retro	X0 male
c(3)G68/c(3)G68	chr3R	10147049	10147486	c3g9.7	w1118	8	10147322	DMTNFB	11	unclear
c(3)G68/+	chr2R	17995574	17995947	c3g-het-7.03	w1118	20	17995675	DME010298	11	Retro
c(3)G68/+	chr2R	21249245	21249912	c3g-het-7.07	w1118	20	21249643	DMTNFB	18	unclear
c(3)G68/+	chr2R	23019335	23019348	c3g-het-3.03	w1118	20	23018567	DMIFACA	26	Retro
c(3)G68/+	chrX	18181932	18182503	c3g-het-7.08	w1118	20	18182142	DM_ROO	17	Retro
c(3)G68/+	chrX	3199368	3199374	c3g-het-7.17	w1118	20	3199394	DMIFACA	24	Retro
c(3)G68/+	chr3R	10047849	10048472	c3g-het-3.01	w1118	20	10048265	DMHFL1	26	DNA
c(3)G68/+	chr3R	17783145	17783709	c3g-het-3.07	w1118	20	17783539	DM_ROO	29	Retro
c(3)G68/+	chr3L	812700	813278	c3g-het-7.07	w1118	20	812898	DMTNFB	15	unclear
c(3)G68/+	chr3R	24395965	24396534	c3g-het-7.17	w1118	20	24296336	JUAN	20	Retro
corolla129/corolla129	chr3L	11288881	11289434	corolla-hom-2.15	corolla	15	11289201	DM_ROO	29	Retro	XXY female
corolla129/corolla129	chr3L	2897699	2898337	corolla-hom-4.04	corolla	18	2898040	DMTNFB	28	unclear
corolla129/corolla129	chr3R	10935579	10936162	corolla-hom-4.05	corolla	18	10935833	DM_ROO	16	Retro
corolla129/corolla129	chr3R	27843919	27844336	corolla-hom-4.07	corolla	18	27844205	DMHFL1	24	DNA
corolla129/corolla129	chr2L	16168232	16168593	corolla-hom-4.11	corolla	18	16168427	DMHFL1	16	DNA	XXY female
corolla129/corolla129	chrX	14328972	14329559	corolla-hom-4.11	corolla	18	14329206	DMHFL1	17	DNA	XXY female
corolla129/corolla129	chr3R	8086859	8087413	corolla-hom-4.12	corolla	18	8087188	DM_ROO	19	Retro
corolla129/corolla129	chrX	16586154	16586753	corolla-hom-4.13	corolla	18	16586605	DMHFL1	15	DNA
corolla129/corolla129	chr2L	4930738	4931407	corolla-hom-4.18	corolla	18	4931032	DMIFACA	22	Retro
corolla129/corolla129	chr3L	5651265	5651786	corolla-hom-6.05	corolla	17	5651585	DMHFL1	18	DNA
corolla129/corolla129	chr2L	2503496	2504147	corolla-hom-6.06	corolla	17	2503752	DM_ROO	18	Retro
corolla129/corolla129	chr2L	5901219	5901393	corolla-hom-6.12	corolla	17	5901180	DMW1DOC	16	Retro
